# Supplementary material for: mCSM-AB: a web server for predicting antibody–antigen affinity changes upon mutation with graph-based signatures
Source: PubMed Central journal article supplement (PMC4987957; doi:10.1093/nar/gkw458), 2016-05-23
Supplement: supp_gkw458_nar-00276-web-b-2016-File010.pdf [file supp_gkw458_nar-00276-web-b-2016-File010.pdf]

# mCSM-AB: a web server for predicting antibody-antigen affinity changes upon mutation with graph-based signatures

Douglas E. V. Pires\*, David B. Ascher\*

## Supplementary Material

### 1 Figures

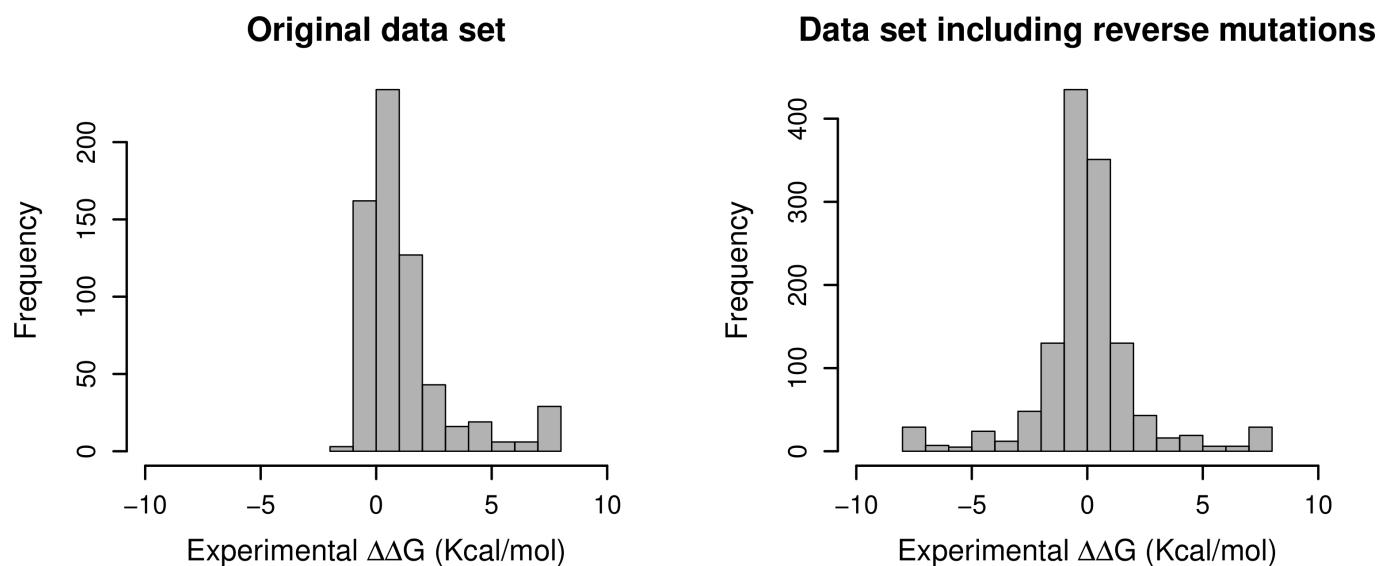

Figure 1: Distribution of experimentally measured effects of mutations on the mCSM-AB data set (given as the difference in Gibbs Free Energy -  $\Delta\Delta G$ ). The histogram on the left shows the original distribution of the 645 mutations and the histogram on the right the histogram including the hypothetical reverse mutations.

### 2 Tables

---

\*Email: douglas.pires@cpqrr.fiocruz.br; Correspondence may also be addressed to dascher@svi.edu.au

## Antibody-Antigen Affinity Changes Upon Mutation

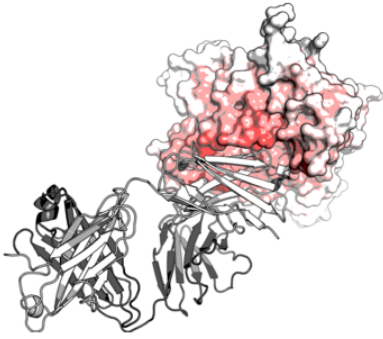

[Run example](#)

**Disclaimer** ×

No PDB files will be retained on the system after being uploaded by the user.

### Single mutation

Description

Wild-type AB complex - PDB format (Ex.: [3NGB](#))

No file chosen

Mutation (Example: G54S)

Mutation chain (Example: H)

### Mutation list

Description

Wild-type AB complex - PDB format (Ex.: [3NGB](#))

No file chosen

Mutation list file

No file chosen

Figure 2: mCSM-AB job submission interface. Users have the option of predicting the effects of single mutations on an uploaded AB-antigen complex or alternatively a list of mutations. The predictions are performed as a regression task (numerical prediction of the difference in Gibbs Free Energy -  $\Delta\Delta G$ ).

Table 1: Pearsons correlation coefficients obtained in blind test per homology model.

| Homology model            | Correlation | Correlation (Increased affinity) | Correlation (Reduced affinity) |
|---------------------------|-------------|----------------------------------|--------------------------------|
| HM_1KTZ                   | 0.87        | 0.64                             | 0.55                           |
| HM_1YY9                   | -0.04       | -0.51                            | -0.46                          |
| HM_2NYY                   | 0.48        | 0.60                             | 0.24                           |
| HM_2NZ9                   | 0.37        | 0.66                             | 0.04                           |
| HM_3BN9                   | 0.54        | 0.42                             | 0.51                           |
| All models                | 0.45        | 0.44                             | 0.22                           |
| All models except HM_1YY9 | 0.54        | 0.53                             | 0.30                           |

## Antibody-Antigen Affinity Change Upon Mutation

Predicted Affinity Change ( $\Delta\Delta G$ ):

10 records per page

| Index | PDB File | Chain | Wild Residue | Residue Position | Mutant Residue | RSA (%) | Predicted $\Delta\Delta G$ | Outcome            |
|-------|----------|-------|--------------|------------------|----------------|---------|----------------------------|--------------------|
| 11    | 3NGB.pdb | B     | T            | 70               | Y              | 70.5    | 0.36                       | Increased affinity |
| 12    | 3NGB.pdb | D     | G            | 471              | N              | 19.6    | -0.912                     | Reduced affinity   |
| 13    | 3NGB.pdb | G     | T            | 406              | V              | 62.4    | -0.055                     | Reduced affinity   |
| 14    | 3NGB.pdb | H     | M            | 69               | F              | 0.1     | -0.464                     | Reduced affinity   |
| 15    | 3NGB.pdb | F     | D            | 187              | M              | 56.0    | -0.529                     | Reduced affinity   |
| 16    | 3NGB.pdb | K     | L            | 78               | K              | 1.1     | -0.281                     | Reduced affinity   |
| 17    | 3NGB.pdb | J     | H            | 102              | D              | 25.8    | -0.624                     | Reduced affinity   |
| 18    | 3NGB.pdb | A     | T            | 63               | C              | 90.2    | -0.522                     | Reduced affinity   |
| 19    | 3NGB.pdb | G     | K            | 207              | L              | 41.3    | 0.072                      | Increased affinity |
| 20    | 3NGB.pdb | B     | G            | 65               | M              | 120.1   | -0.57                      | Reduced affinity   |

Showing 11 to 20 of 30 entries

[-- Previous](#) [1](#) [2](#) [3](#) [Next --](#)

[Run another prediction](#)

[Download results](#)

5

Figure 3: mCSM-AB result page for predicting effects of a list of mutations as a regression task. The following information will be displayed: identification of the mutation (1), residue relative solvent accessibility (RSA) (2), Predicted  $\Delta\Delta G$  (3) and direction of change (4). Users can also download the predictions as a tab-separated file (5).

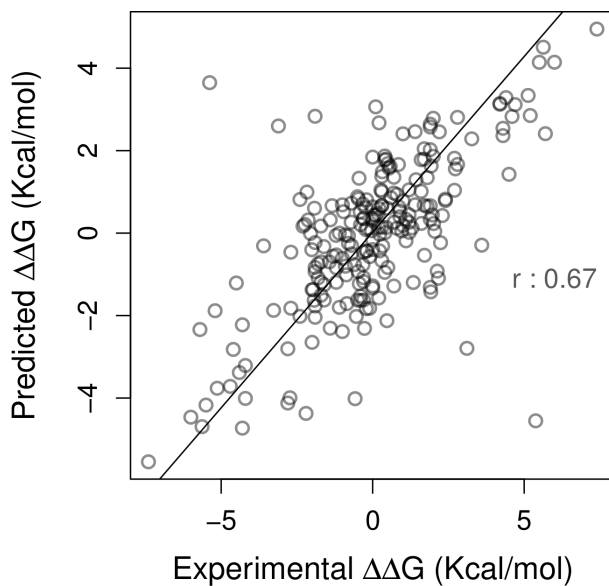

Figure 4: Regression plot between the experimental and predicted affinity change in Kcal/mol for a blind test derived from [1]. mCSM-AB obtained a Pearson’s correlation of 0.67.

### 3 Case Study

We have further evaluate mCSM-AB oin a complementary blind test composed by 114 mutations from 4 different antibody/antigen, as well as their hypothetical reverse mutations obtained from [1].

The Figure S4 shows a regression plot between experimental and predicted affinity changes for the 228 mutations. mCSM-AB achieved a correlation of 0.67 on this blind test. The models and predictions are available as downloadable files on the Web server.

## 4 Supervised Learning

### 4.1 Regression

For regression tasks, the prediction goal for mCSM-AB was the change affinity of the Ab-antigen complex denoted by the variation in Gibbs Free Energy of binding ( $\Delta\Delta G = \Delta G_{wt} - \Delta G_{mt}$ ) of a mutation, where  $\Delta G_{wt}$  and  $\Delta G_{mt}$  are the Gibbs Free Energy of binding for the wildtype and mutant complexes respectively. Different categories of algorithms implemented in the Weka toolkit [2] were evaluated. Those included K-Nearest Neighbours (KNN), Regression Trees and Gaussian Processes, with the latter presenting the best performance. Gaussian Process [3] is a flexible non-linear method for regression and data interpolation based on a kernel function, which also gives uncertainty estimation of the predictions.

### 4.2 Evaluation procedures and metrics

The predictive models' were evaluated under 10-fold cross validation and in blind tests. The following metrics were used to assess predictive performance and were chosen to directly compare mCSM-AB with the other available methods:

- **Pearsons correlation coefficient (r):** Used in regression tasks, quantifies que linear correlation/association between two variables, its direction and dispersion/strength. Its values range from -1 to 1, where perfectly correlated variables achieve an r of 1 (or -1, for a negative correlation) while a correlation of 0 would denote no linear relationship between variables.

## References

- [1] Alexander Benedix, Caroline M Becker, Bert L de Groot, Amedeo Caflisch, and Rainer A Böckmann. Predicting free energy changes using structural ensembles. *Nat. Methods*, 6(1):3–4, 2009.
- [2] Mark Hall, Eibe Frank, Geoffrey Holmes, Bernhard Pfahringer, Peter Reutemann, and Ian H Witten. The WEKA data mining software: an update. *ACM SIGKDD explorations newsletter*, 11(1):10–18, 2009.
- [3] Carl Edward Rasmussen and Christopher KI Williams. *Gaussian processes for machine learning*, volume 1. MIT Press, Cambridge, MA, USA, 2006.
